# Supplementary material
Source: PubMed Central journal article supplement (PMC5821202)
Supplement: jciinsight-3-96308-s001.pdf [file jciinsight-3-96308-s001.pdf]

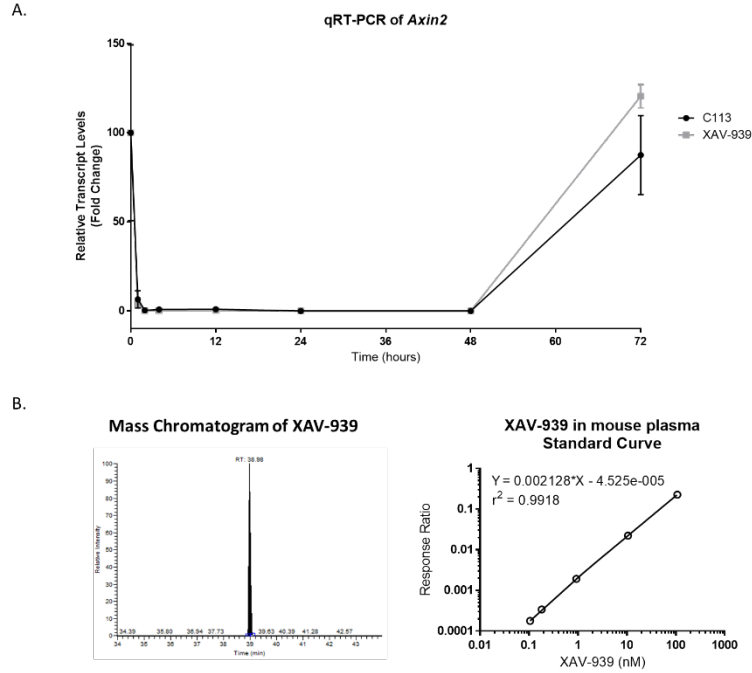

**Supplementary Figure 1:** (A) *Axin2* transcript levels after treatment with C-113 or XAV-939 in NIH3T3 cells constitutively overexpressing *Wnt3a*. Data is represented as mean  $\pm$ SD (B) XAV-939 levels measured in plasma by mass spectrometry at 0, 3 and 24 hours post injection of saline or XAV-939 were fitted to a standard curve. The minimal quantifiable limit was 0.100 nM.

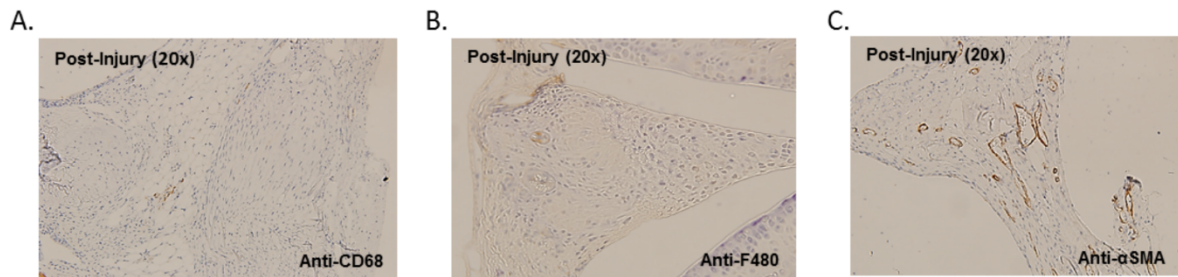

**Supplementary Figure 2:**

Immunohistochemistry of (A) CD-68 (macrophage) and (B) F480 (macrophage) does not identify any positive cells 10-weeks post DMM surgery. (C) Immunohistochemistry of  $\alpha$ SMA of the joint space from control mice 10 weeks following DMM surgery was restricted to pericytes of blood vessels. No significant staining of myofibroblasts is noted.

**A. Murine Synovium**

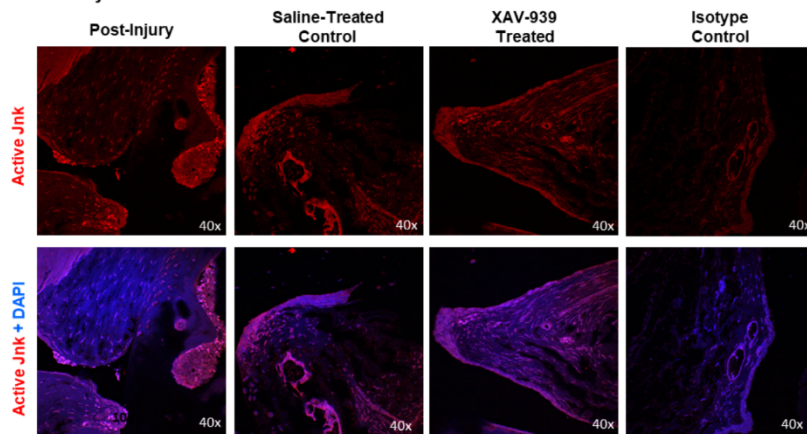

**B. Human Synovial Fibroblasts**

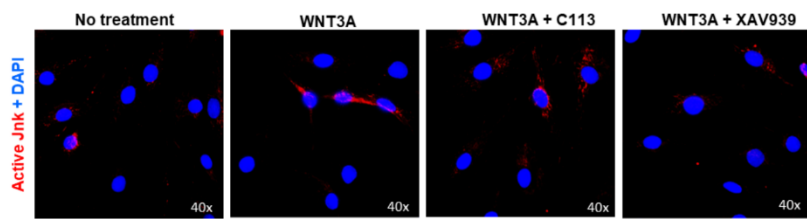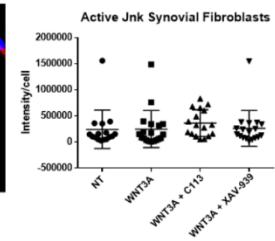

**C. Murine Cartilage**

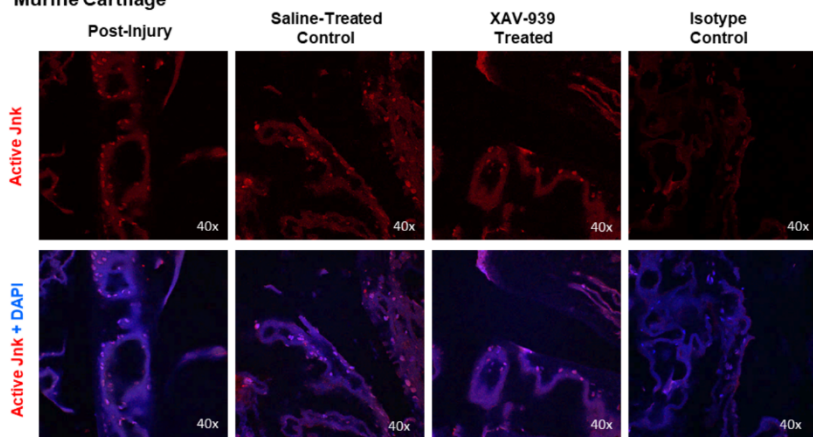

**D. Human Chondrocytes**

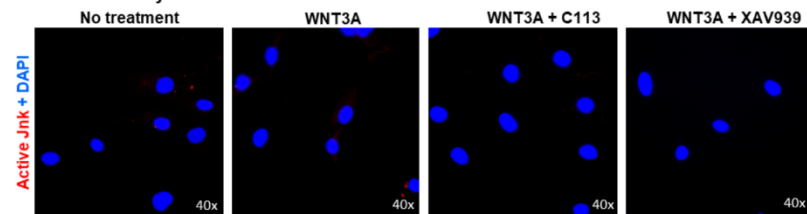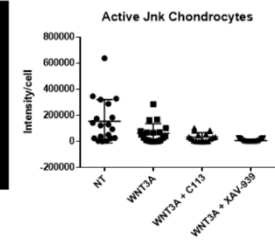

**Supplementary Figure 3:**

Immunofluorescence of active-Jnk (red) as an indication of non-canonical Wnt signaling, and DAPI (blue). (A) Synovial tissue from mice post injury, with saline treatment, or XAV-939 treatment show similar levels of staining. Isotype controls show low levels of background staining. (B) Human synovial fibroblasts do not show changes in staining. (C) Cartilage from mice post-injury, after saline treatment, or after XAV-939 treatment do not show significant changes in active-Jnk staining. Data was analyzed by one-way ANOVA with Tukey's post-hoc test. Lines indicates mean  $\pm$  SD, n=16-19. (D) Human chondrocytes similarly show low levels of staining with no differences between treatment groups. Data was analyzed by one-way ANOVA with Tukey's post-hoc test. Lines indicates mean  $\pm$  SD, n=15-21.

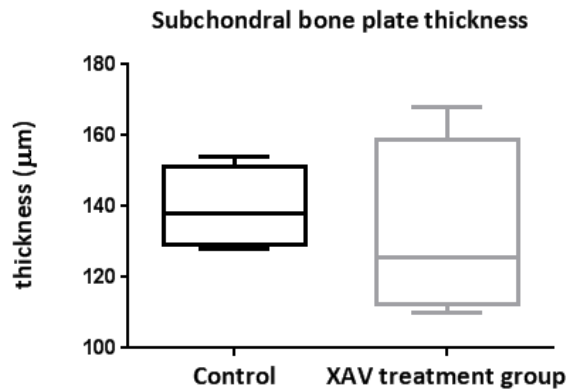

**Supplementary Figure 4:** The subchondral bone plate thickness was assessed in mice at 10 weeks post XAV or control vehicle treatment in mice subjected to DMM surgery (n = 4 mice per group). For data presented as box-and-whiskers plots, horizontal lines indicate the medians, cross marks indicate the means, boxes indicate the 25<sup>th</sup> to 75<sup>th</sup> percentiles, and whiskers indicate the minimum and maximum values of the data set.

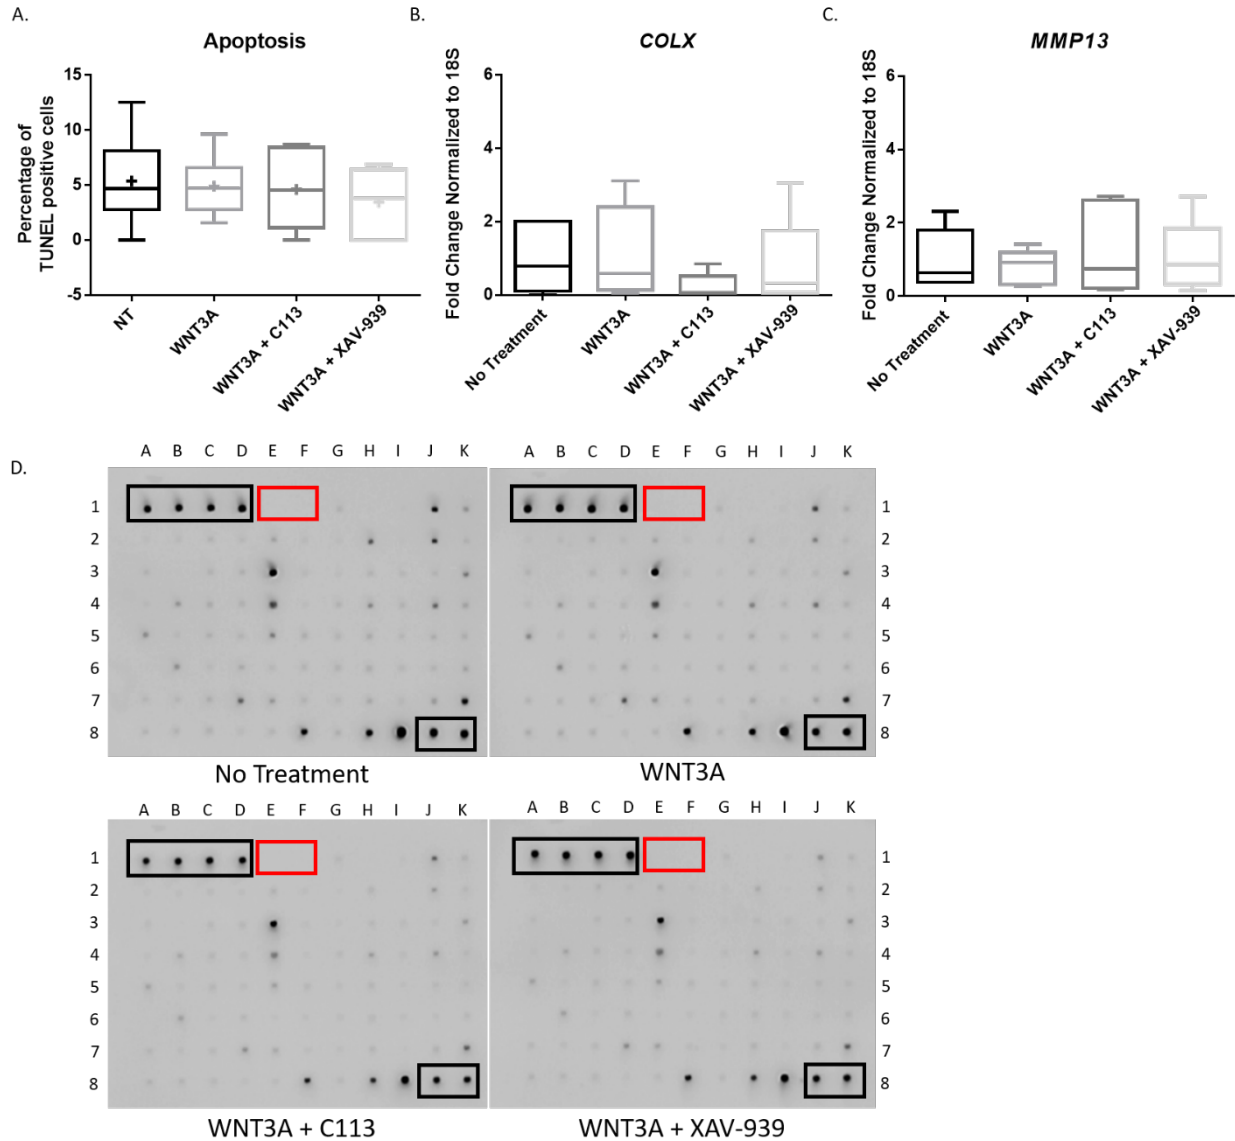

**Supplementary Figure 5:**

Chondrocytes treated with conditioned media from treated synovial fibroblasts show no differences in (A) apoptosis by TUNEL staining, (B) hypertrophy as indicated by *COLX* levels by RT-PCR, or (C) proteinase levels as indicated by *MMP13* RT-PCR. (D) Representative cytokine arrays from treated synovial fibroblasts. Positive controls are shown in black boxes; negative controls are shown in red boxes. Quantification normalized to negative and positive controls is shown in Supplementary Figure 1 by two-way ANOVA, \* $p < 0.05$ ,  $n = 3$ . For data presented as box-

and-whiskers plots, horizontal lines indicate the medians, cross marks indicate the means, boxes indicate the 25<sup>th</sup> to 75<sup>th</sup> percentiles, and whiskers indicate the minimum and maximum values of the data set.

**Supplementary Table 1: Cytokine levels secreted from treated synovial fibroblasts**

| Location/<br>Cytokine                                     |      | No<br>Treatment | WNT3A    | WNT3A +<br>C113 | WNT3A +<br>XAV-939 | NT<br>vs<br>WNT3A | WNT3A<br>vs<br>C113 | WNT3A<br>vs<br>XAV939 |
|-----------------------------------------------------------|------|-----------------|----------|-----------------|--------------------|-------------------|---------------------|-----------------------|
| <b>G1.</b><br><b>CXCL5</b>                                | Mean | 517.3333        | 539.1062 | 554.7092        | 474.2809           | ns                | ns                  | ns                    |
|                                                           | SD   | 464.0758        | 295.8546 | 239.7991        | 180.6758           |                   |                     |                       |
| <b>H1.</b><br><b>G-CSF</b>                                | Mean | 197.3333        | 76.53072 | 91.2111         | 100.5902           | ns                | ns                  | ns                    |
|                                                           | SD   | 183.9275        | 80.14999 | 79.20692        | 153.5481           |                   |                     |                       |
| <b>I1.</b><br><b>GM-CSF</b>                               | Mean | 35              | 268.3828 | 350.9959        | 132.2794           | ns                | ns                  | ns                    |
|                                                           | SD   | 60.62178        | 242.2328 | 194.3759        | 47.17378           |                   |                     |                       |
| <b>J1.</b><br><b>GRO <math>\alpha/\beta/\gamma</math></b> | Mean | 3251.667        | 2069.342 | 3267.763        | 2000.026           | ns                | ns                  | ns                    |
|                                                           | SD   | 1830.739        | 993.1743 | 909.7786        | 294.3839           |                   |                     |                       |
| <b>K1.</b><br><b>CXCL1</b>                                | Mean | 665.6667        | 617.1657 | 1091.106        | 770.8978           | ns                | ns                  | ns                    |
|                                                           | SD   | 611.2907        | 380.4963 | 238.9643        | 363.1515           |                   |                     |                       |
| <b>A2.</b><br><b>CCL1</b>                                 | Mean | 172.6667        | 258.9047 | 289.436         | 394.9648           | ns                | ns                  | ns                    |
|                                                           | SD   | 150.0145        | 223.3532 | 46.9348         | 186.3156           |                   |                     |                       |
| <b>B2.</b><br><b>IL-1<math>\alpha</math></b>              | Mean | 139.3333        | 518.6817 | 403.949         | 227.6429           | ns                | ns                  | ns                    |
|                                                           | SD   | 226.7693        | 191.2578 | 76.57477        | 263.9387           |                   |                     |                       |
| <b>C2.</b><br><b>IL-1<math>\beta</math></b>               | Mean | 372.3333        | 617.717  | 544.3953        | 553.8302           | ns                | ns                  | ns                    |
|                                                           | SD   | 333.3382        | 80.22275 | 165.7887        | 224.4939           |                   |                     |                       |
| <b>D2.</b><br><b>IL-2</b>                                 | Mean | 136.6667        | 351.1559 | 365.2579        | 412.3731           | ns                | ns                  | ns                    |
|                                                           | SD   | 236.7136        | 162.9679 | 162.6996        | 420.2917           |                   |                     |                       |
| <b>E2.</b><br><b>IL-3</b>                                 | Mean | 902.6667        | 1037.501 | 756.4279        | 688.3521           | ns                | ns                  | ns                    |
|                                                           | SD   | 511.8177        | 349.5863 | 113.4829        | 438.1831           |                   |                     |                       |
| <b>F2.</b><br><b>IL-4</b>                                 | Mean | 310.3333        | 238.6649 | 234.7083        | 358.5393           | ns                | ns                  | ns                    |
|                                                           | SD   | 49.64205        | 161.6632 | 207.236         | 257.4653           |                   |                     |                       |
| <b>G2.</b><br><b>IL-5</b>                                 | Mean | 100.3333        | 115.1274 | 259.7026        | 164.8752           | ns                | ns                  | ns                    |
|                                                           | SD   | 173.7824        | 118.924  | 146.3379        | 172.2562           |                   |                     |                       |
| <b>H2.</b><br><b>IL-6</b>                                 | Mean | 4926.334        | 1490.4   | 1957.514        | 1547.184           | *                 | ns                  | ns                    |
|                                                           | SD   | 3539.074        | 329.4464 | 1879.609        | 907.1645           |                   |                     |                       |
| <b>I2.</b><br><b>IL-7</b>                                 | Mean | 0               | 233.5146 | 81.38654        | 140.5227           | ns                | ns                  | ns                    |
|                                                           | SD   | 0               | 204.5225 | 107.9491        | 63.54575           |                   |                     |                       |
| <b>J2.</b><br><b>IL-8</b>                                 | Mean | 3188.667        | 1855.519 | 2909.773        | 1912.979           | ns                | ns                  | ns                    |
|                                                           | SD   | 666.3102        | 490.8002 | 1885.114        | 352.7683           |                   |                     |                       |
| <b>K2.</b><br><b>IL-10</b>                                | Mean | 343             | 533.8448 | 509.0786        | 464.401            | ns                | ns                  | ns                    |
|                                                           | SD   | 330.3286        | 161.7478 | 262.5516        | 301.1324           |                   |                     |                       |

|                                 |      |          |          |          |          |    |    |    |
|---------------------------------|------|----------|----------|----------|----------|----|----|----|
| <b>A3.</b>                      | Mean | 237.3333 | 483.2774 | 508.8418 | 593.9536 | ns | ns | ns |
| <b>IL-12</b>                    | SD   | 206.413  | 360.4365 | 181.1792 | 122.1686 |    |    |    |
| <b>B3.</b>                      | Mean | 32.66667 | 138.3587 | 63.36218 | 128.1339 | ns | ns | ns |
| <b>IL-13</b>                    | SD   | 56.58033 | 183.9713 | 84.32649 | 221.9344 |    |    |    |
| <b>C3.</b>                      | Mean | 591.3333 | 501.2566 | 652.8455 | 550.6301 | ns | ns | ns |
| <b>IL-15</b>                    | SD   | 257.201  | 302.8881 | 139.5835 | 259.7019 |    |    |    |
| <b>D3.</b>                      | Mean | 160      | 786.6755 | 808.5609 | 578.9036 | ns | ns | ns |
| <b>IFN<math>\gamma</math></b>   | SD   | 342.8863 | 184.7946 | 294.7308 | 236.9119 |    |    |    |
| <b>E3.</b>                      | Mean | 12385    | 10858.88 | 13155.19 | 10860.47 | ns | *  | ns |
| <b>CCL2</b>                     | SD   | 1141.888 | 1194.907 | 2802.639 | 3219.656 |    |    |    |
| <b>F3.</b>                      | Mean | 330.3333 | 446.5989 | 441.7495 | 156.3083 | ns | ns | ns |
| <b>CCL8</b>                     | SD   | 102.4711 | 232.7761 | 170.2823 | 135.5998 |    |    |    |
| <b>G3.</b>                      | Mean | 57       | 191.9305 | 160.9236 | 190.7821 | ns | ns | ns |
| <b>CCL7</b>                     | SD   | 98.7269  | 195.2542 | 139.3677 | 255.9009 |    |    |    |
| <b>H3.</b>                      | Mean | 253      | 475.8377 | 621.2105 | 193.933  | ns | ns | ns |
| <b>M-CSF</b>                    | SD   | 279.4799 | 295.4485 | 147.7442 | 176.2811 |    |    |    |
| <b>I3.</b>                      | Mean | 310      | 427      | 556.5483 | 409.0943 | ns | ns | ns |
| <b>CCL22</b>                    | SD   | 357.3835 | 234.2867 | 79.52264 | 192.9981 |    |    |    |
| <b>J3.</b>                      | Mean | 288      | 577.9829 | 345.0297 | 374.9343 | ns | ns | ns |
| <b>CXCL9</b>                    | SD   | 214.2919 | 289.0363 | 114.6902 | 239.233  |    |    |    |
| <b>K3.</b>                      | Mean | 1248.333 | 1504.763 | 1878.284 | 1396.57  | ns | ns | ns |
| <b>CCL4</b>                     | SD   | 629.1219 | 189.0767 | 624.9703 | 675.438  |    |    |    |
| <b>A4.</b>                      | Mean | 84.66666 | 559.0309 | 410.554  | 388.0559 | ns | ns | ns |
| <b>MIP-1<math>\Delta</math></b> | SD   | 92.87267 | 127.0269 | 235.5571 | 291.6957 |    |    |    |
| <b>B4.</b>                      | Mean | 1111.333 | 1014.431 | 1047.036 | 890.8857 | ns | ns | ns |
| <b>CCL5</b>                     | SD   | 242.2031 | 483.2724 | 441.3416 | 374.2989 |    |    |    |
| <b>C4.</b>                      | Mean | 489.3333 | 630.4211 | 827.8269 | 740.2297 | ns | ns | ns |
| <b>SCF</b>                      | SD   | 69.92377 | 339.9217 | 277.9688 | 453.6564 |    |    |    |
| <b>D4.</b>                      | Mean | 374.6667 | 714.9613 | 485.6248 | 407.5582 | ns | ns | ns |
| <b>SDF-1<math>\alpha</math></b> | SD   | 60.36831 | 149.2508 | 64.63656 | 298.8162 |    |    |    |
| <b>E4.</b>                      | Mean | 5437.334 | 4928.138 | 4342.423 | 4347.376 | ns | ns | ns |
| <b>CCL17</b>                    | SD   | 1104.408 | 1035.704 | 902.1822 | 1756.308 |    |    |    |
| <b>F4.</b>                      | Mean | 64.66666 | 170.4254 | 247.3459 | 71.71028 | ns | ns | ns |
| <b>TGF<math>\beta</math>1</b>   | SD   | 393.5179 | 85.65996 | 231.2122 | 123.2123 |    |    |    |
| <b>G4.</b>                      | Mean | 413.6667 | 348.986  | 479.1926 | 630.8306 | ns | ns | ns |
| <b>TNF<math>\alpha</math></b>   | SD   | 313.497  | 144.4312 | 159.9539 | 142.4667 |    |    |    |
| <b>H4.</b>                      | Mean | 1555     | 1481.324 | 1768.048 | 1259.993 | ns | ns | ns |
| <b>TNF<math>\beta</math></b>    | SD   | 473.6201 | 413.5323 | 607.3929 | 641.8835 |    |    |    |
| <b>I4.</b>                      | Mean | 498.6667 | 463.8719 | 552.3489 | 200.5122 | ns | ns | ns |
| <b>EGF</b>                      | SD   | 351.7405 | 118.3646 | 27.67212 | 226.9563 |    |    |    |
| <b>J4.</b>                      | Mean | 2129.667 | 1946.951 | 2155.689 | 1389.6   | ns | ns | ns |
| <b>IGF-1</b>                    | SD   | 826.4438 | 391.4824 | 517.1813 | 591.4124 |    |    |    |
|                                 | Mean | 557.3333 | 522.2246 | 617.4254 | 280.6197 | ns | ns | ns |



|                   |      |          |          |          |          |    |    |    |
|-------------------|------|----------|----------|----------|----------|----|----|----|
| <b>K4.</b>        | SD   | 614.3007 | 338.0037 | 176.7813 | 95.77209 |    |    |    |
| <b>Angiogenin</b> |      |          |          |          |          |    |    |    |
| <b>A5.</b>        | Mean | 1219.667 | 1610.535 | 1176.085 | 1104.478 | ns | ns | ns |
| <b>OSM</b>        | SD   | 611.2163 | 381.0736 | 606.635  | 247.2565 |    |    |    |
| <b>B5.</b>        | Mean | 159      | 521.0551 | 289.1977 | 350.4686 | ns | ns | ns |
| <b>TPO</b>        | SD   | 156.8088 | 201.0601 | 173.4753 | 249.7322 |    |    |    |
| <b>C5.</b>        | Mean | 434.6667 | 852.1916 | 628.1257 | 675.43   | ns | ns | ns |
| <b>VEGF-A</b>     | SD   | 118.0946 | 168.4529 | 140.9209 | 283.4581 |    |    |    |
| <b>D5.</b>        | Mean | 213.3333 | 429.1155 | 545.508  | 638.74   | ns | ns | ns |
| <b>PDGF-BB</b>    | SD   | 486.9808 | 179.7485 | 340.9279 | 421.0736 |    |    |    |
| <b>E5.</b>        | Mean | 2003     | 1805.84  | 1889.018 | 1633.985 | ns | ns | ns |
| <b>Leptin</b>     | SD   | 624.8176 | 238.6378 | 764.313  | 786.2117 |    |    |    |
| <b>F5.</b>        | Mean | 631      | 565.5611 | 581.7552 | 739.4893 | ns | ns | ns |
| <b>BDNF</b>       | SD   | 390.3165 | 98.17242 | 80.77022 | 315.7466 |    |    |    |
| <b>G5.</b>        | Mean | 444.6667 | 468.0326 | 505.8438 | 299.826  | ns | ns | ns |
| <b>CXCL13</b>     | SD   | 198.3364 | 389.9937 | 199.8865 | 123.3178 |    |    |    |
| <b>H5.</b>        | Mean | 724.3333 | 618.4196 | 694.6305 | 771.2009 | ns | ns | ns |
| <b>CCL23</b>      | SD   | 256.7106 | 176.1336 | 200.2344 | 38.25303 |    |    |    |
| <b>I5.</b>        | Mean | 183.3333 | 451.7731 | 224.9818 | 578.8217 | ns | ns | ns |
| <b>CCL11</b>      | SD   | 189.8008 | 262.0195 | 147.969  | 83.00328 |    |    |    |
| <b>J5.</b>        | Mean | 539      | 667.4798 | 449.8715 | 460.0006 | ns | ns | ns |
| <b>CCL24</b>      | SD   | 468.5414 | 169.8042 | 269.2074 | 411.4914 |    |    |    |
| <b>K5.</b>        | Mean | 295.3333 | 699.3896 | 487.4492 | 514.3765 | ns | ns | ns |
| <b>CCL26</b>      | SD   | 288.28   | 231.0463 | 248.8891 | 106.2101 |    |    |    |
| <b>A6.</b>        | Mean | 40       | 69.87245 | 142.3749 | 92.1369  | ns | ns | ns |
| <b>FGF-4</b>      | SD   | 69.28204 | 71.5704  | 75.34004 | 159.5858 |    |    |    |
| <b>B6.</b>        | Mean | 1432.333 | 1590.523 | 1709.148 | 1438.604 | ns | ns | ns |
| <b>FGF-6</b>      | SD   | 722.911  | 397.9203 | 647.6685 | 649.3059 |    |    |    |
| <b>C6.</b>        | Mean | 226      | 246.1549 | 153.9658 | 275.2236 | ns | ns | ns |
| <b>FGF-7</b>      | SD   | 268.6317 | 281.4367 | 118.5367 | 205.8933 |    |    |    |
| <b>D6.</b>        | Mean | 579.3333 | 788.138  | 499.3641 | 620.3659 | ns | ns | ns |
| <b>FGF-9</b>      | SD   | 458.8162 | 431.6348 | 115.9928 | 370.3884 |    |    |    |
| <b>E6.</b>        | Mean | 184      | 463.0848 | 285.4066 | 122.2616 | ns | ns | ns |
| <b>FLT-Ligand</b> | SD   | 167.3111 | 318.3135 | 211.2077 | 142.465  |    |    |    |
| <b>F6.</b>        | Mean | 407.3333 | 461.7466 | 602.1606 | 212.0667 | ns | ns | ns |
| <b>CX3CL1</b>     | SD   | 212.1658 | 383.7504 | 226.5944 | 208.5442 |    |    |    |
| <b>G6.</b>        | Mean | 653      | 566.786  | 320.5384 | 392.6656 | ns | ns | ns |
| <b>CXCL6</b>      | SD   | 95.24705 | 284.3901 | 44.22207 | 87.81561 |    |    |    |
| <b>H6.</b>        | Mean | 758      | 678.3712 | 494.1227 | 856.3358 | ns | ns | ns |
| <b>GDNF</b>       | SD   | 187.0642 | 146.9467 | 32.62173 | 350.9413 |    |    |    |
| <b>I6.</b>        | Mean | 225.6667 | 542.632  | 345.8209 | 455.4476 | ns | ns | ns |
| <b>HGF</b>        | SD   | 225.003  | 251.4714 | 94.66505 | 30.72704 |    |    |    |
| <b>J6.</b>        | Mean | 508.3333 | 385.0254 | 436.8597 | 546.0181 | ns | ns | ns |

|                                 |      |          |          |          |          |    |    |    |
|---------------------------------|------|----------|----------|----------|----------|----|----|----|
| <b>IGFBP-1</b>                  | SD   | 165.4036 | 258.5357 | 148.306  | 193.1065 |    |    |    |
| <b>K6.</b>                      | Mean | 549      | 541.9671 | 508.2943 | 836.2022 | ns | ns | ns |
| <b>IGFBP-2</b>                  | SD   | 276.1358 | 257.771  | 101.3983 | 373.8076 |    |    |    |
| <b>A7.</b>                      | Mean | 333.3333 | 318.304  | 553.2021 | 497.1392 | ns | ns | ns |
| <b>IGFBP-3</b>                  | SD   | 292.9733 | 126.22   | 329.6389 | 308.8108 |    |    |    |
| <b>B7.</b>                      | Mean | 197.3333 | 403.1744 | 422.1639 | 145.7046 | ns | ns | ns |
| <b>IGFBP-4</b>                  | SD   | 269.2013 | 329.7807 | 86.18457 | 38.10611 |    |    |    |
| <b>C7.</b>                      | Mean | 580      | 522.1465 | 634.9226 | 303.3663 | ns | ns | ns |
| <b>IL-16</b>                    | SD   | 438.9795 | 202.8318 | 247.5257 | 139.5344 |    |    |    |
| <b>D7.</b>                      | Mean | 2711.333 | 2506.545 | 1946.687 | 1783.747 | ns | ns | ns |
| <b>CXCL10</b>                   | SD   | 433.7123 | 636.0097 | 520.63   | 646.9572 |    |    |    |
| <b>E7.</b>                      | Mean | 1186     | 1325.418 | 1474.982 | 1164.159 | ns | ns | ns |
| <b>LIF</b>                      | SD   | 259.0927 | 644.1686 | 534.7456 | 674.7619 |    |    |    |
| <b>F7.</b>                      | Mean | 453.6667 | 686.9127 | 543.196  | 418.9318 | ns | ns | ns |
| <b>TNFSF14</b>                  | SD   | 197.5964 | 217.6527 | 209.0251 | 106.3046 |    |    |    |
| <b>G7.</b>                      | Mean | 218.3333 | 490.8565 | 158.6044 | 387.3205 | ns | ns | ns |
| <b>CCL13</b>                    | SD   | 262.096  | 252.4347 | 105.987  | 155.4454 |    |    |    |
| <b>H7.</b>                      | Mean | 639      | 803.3098 | 870.6154 | 540.5483 | ns | ns | ns |
| <b>MIF</b>                      | SD   | 362.1975 | 283.6836 | 481.2186 | 300.463  |    |    |    |
| <b>I7.</b>                      | Mean | 307.6667 | 371.3905 | 231.2672 | 249.6784 | ns | ns | ns |
| <b>MIP-3<math>\alpha</math></b> | SD   | 344.1516 | 169.7711 | 152.6773 | 122.1354 |    |    |    |
| <b>J7.</b>                      | Mean | 991      | 1030.692 | 708.7008 | 780.823  | ns | ns | ns |
| <b>CXCL7</b>                    | SD   | 536.4243 | 122.1732 | 315.5588 | 142.09   |    |    |    |
| <b>K7.</b>                      | Mean | 4476     | 3725.52  | 4151.466 | 2853.974 | ns | ns | ns |
| <b>NT-3</b>                     | SD   | 2491.087 | 941.5571 | 1359.68  | 1252.662 |    |    |    |
| <b>A8.</b>                      | Mean | 411      | 712.811  | 635.7987 | 638.7961 | ns | ns | ns |
| <b>NT-4</b>                     | SD   | 455.0923 | 119.9568 | 420.7758 | 49.7103  |    |    |    |
| <b>B8.</b>                      | Mean | 436.3333 | 689.7337 | 695.6617 | 409.4119 | ns | ns | ns |
| <b>OPN</b>                      | SD   | 135.3711 | 111.1815 | 216.2941 | 239.1576 |    |    |    |
| <b>C8.</b>                      | Mean | 539.6667 | 688.0743 | 783.3864 | 403.5011 | ns | ns | ns |
| <b>OPG</b>                      | SD   | 219.1628 | 114.0735 | 212.3228 | 153.3234 |    |    |    |
| <b>D8.</b>                      | Mean | 93.33334 | 308.1012 | 517.0475 | 118.0605 | ns | ns | ns |
| <b>PARC</b>                     | SD   | 155.6353 | 294.4397 | 342.2063 | 75.61629 |    |    |    |
| <b>E8.</b>                      | Mean | 205.3333 | 525.9961 | 313.1626 | 271.4533 | ns | ns | ns |
| <b>PLGF</b>                     | SD   | 233.5216 | 256.7698 | 171.8877 | 76.20089 |    |    |    |
| <b>F8.</b>                      | Mean | 8760.667 | 7291.871 | 6551.551 | 6436.653 | ns | ns | ns |
| <b>TGF<math>\beta</math>2</b>   | SD   | 2227.716 | 1073.548 | 1814.304 | 3443.874 |    |    |    |
| <b>G8.</b>                      | Mean | 582.6667 | 668.7567 | 501.4561 | 199.3672 | ns | ns | ns |
| <b>TGF<math>\beta</math>3</b>   | SD   | 113.3152 | 327.2357 | 70.23309 | 66.96215 |    |    |    |
| <b>H8.</b>                      | Mean | 7219     | 5981.077 | 5949.739 | 5194.692 | ns | ns | ns |
| <b>TIMP-1</b>                   | SD   | 1463.506 | 1229.859 | 1926.377 | 2144.599 |    |    |    |
| <b>I8.</b>                      | Mean | 20696    | 14312.15 | 14365.53 | 11665.27 | *  | ns | *  |
| <b>TIMP-2</b>                   | SD   | 3333.575 | 4117.292 | 6080.468 | 3338.078 |    |    |    |

**Supplementary Table 2: Oligonucleotide primer sequences used for quantitative RT-PCR**

| <b>Primer</b>   | <b>Direction</b>   | <b>Sequence</b>                                                                           |
|-----------------|--------------------|-------------------------------------------------------------------------------------------|
| Human<br>AXIN2  | Forward<br>Reverse | 5'-GCA GTG TGA AGG CCA ATG G-3'<br>5'-GCA GGC GGT GGG TTC TC-3'                           |
| Human<br>COL1A1 | Forward<br>Reverse | 5'-GCC AGA TGG GTC CCC GAG GT-3'<br>5'-GGG GGT CCA GCA GCA CCA AC-3'                      |
| Human<br>COL2A1 | Forward<br>Reverse | 5'-GCA GCA AGA GCA AGG AGA AG-3'<br>5'-GCG TAG GAA GGT CAT CTG GA-3'                      |
| Human<br>PRG4   | Forward<br>Reverse | 5'-GAT GCA GGG TAC CCC AAA-3'<br>5'-CAG ACT TTG GAT AAG GTC TGC C-3'                      |
| Human<br>COLX   | Forward<br>Reverse | 5'-TAC CTT GTG CCT CCC ATT CAA-3'<br>5'-TAC AGT ACA GTG CAT AAA TAA ATA ATA TAT CTC CA-3' |
| Human<br>MMP13  | Forward<br>Reverse | 5'-ACT GAG AGG CTC CGA GAA ATG-3'<br>5'-GAA CCC CGC ATC TTG GCT T-3'                      |
| 18S             | Forward<br>Reverse | 5'-CGC CGC TAG AGG TGA AAT TCT-3'<br>5'-CGA ACC TCC GAC TTT CGT TCT-3'                    |
